# Supplementary material
Source: PubMed Central journal article supplement (PMC1941464)

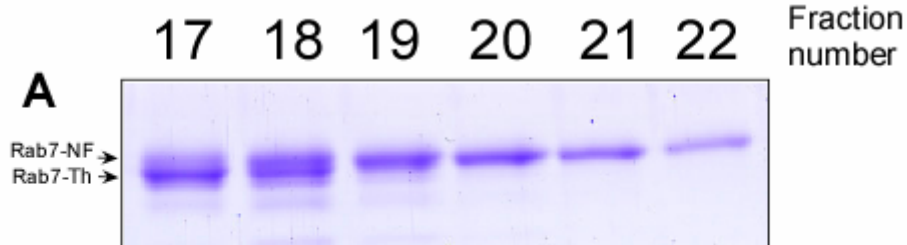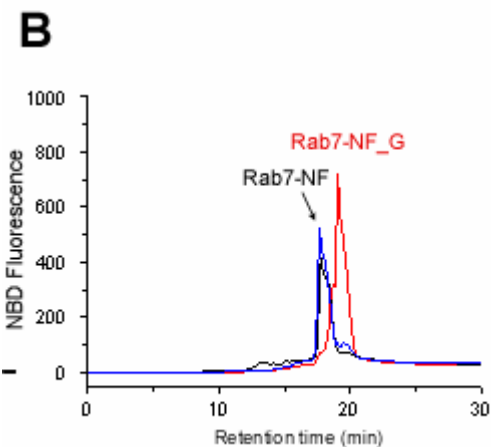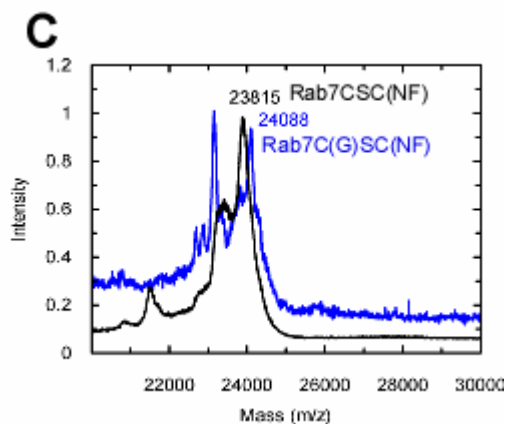

Supplement: pnas_0701817104_1.pdf [file pnas_0701817104_1.pdf]

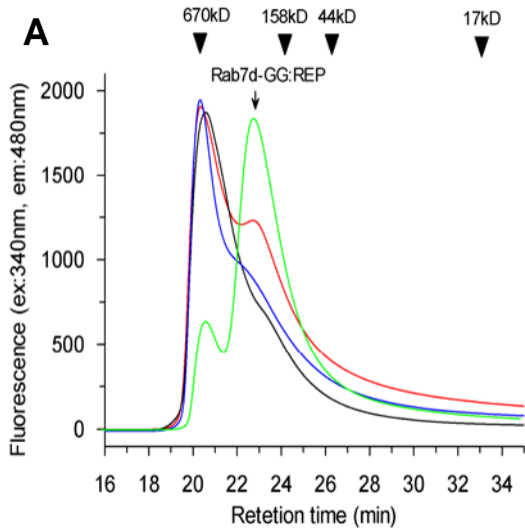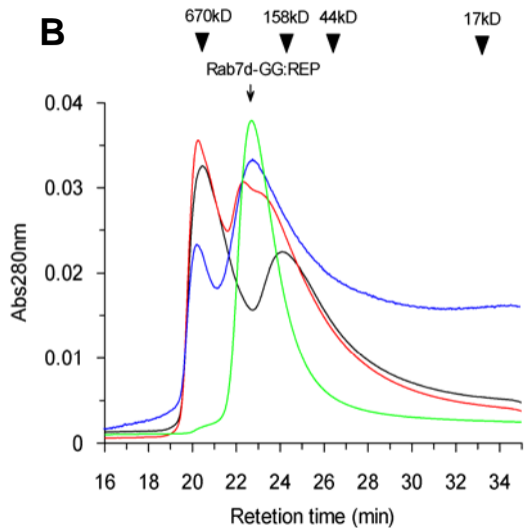

Supplement: pnas_0701817104_10.pdf [file pnas_0701817104_10.pdf]

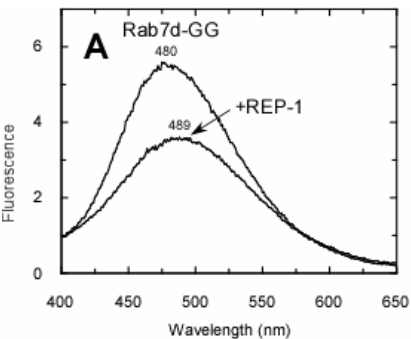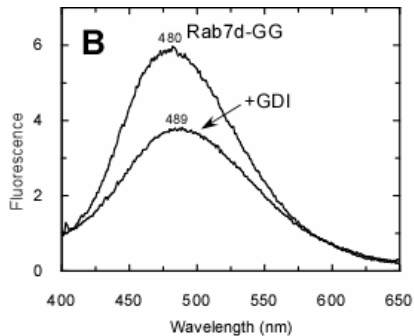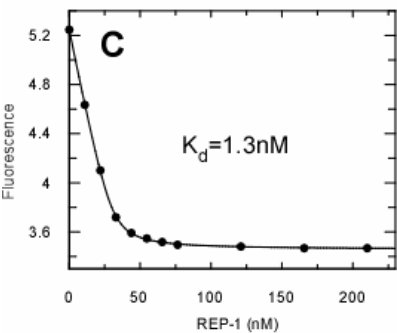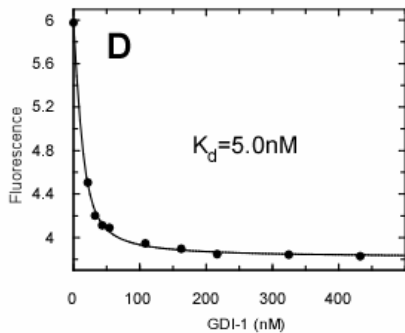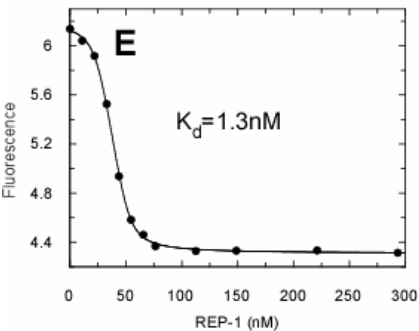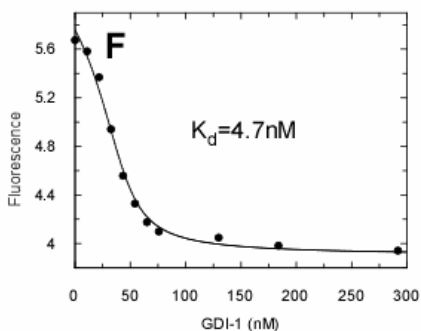

Supplement: pnas_0701817104_11.pdf [file pnas_0701817104_11.pdf]

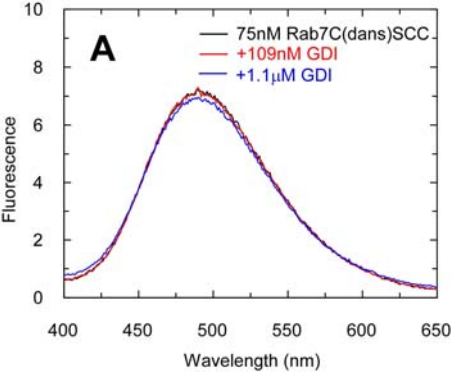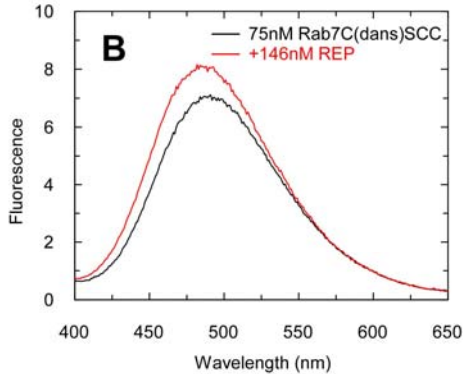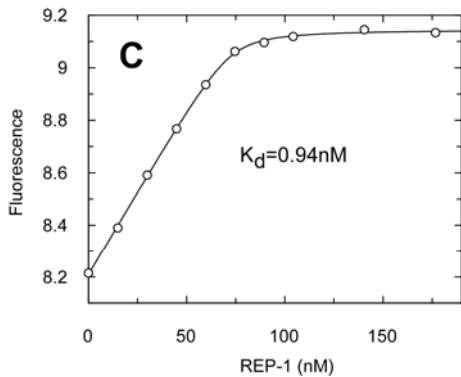

Supplement: pnas_0701817104_12.pdf [file pnas_0701817104_12.pdf]

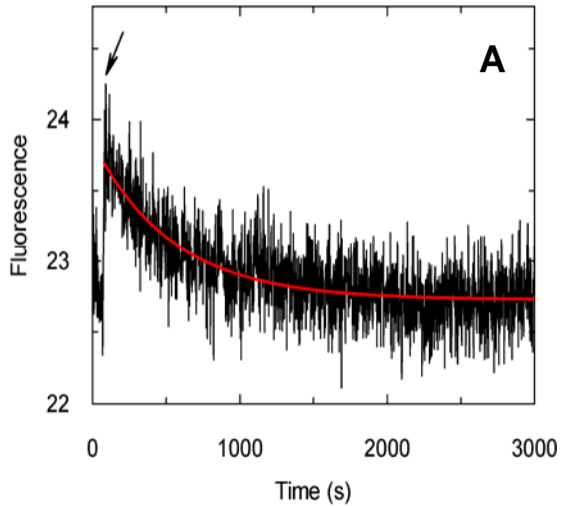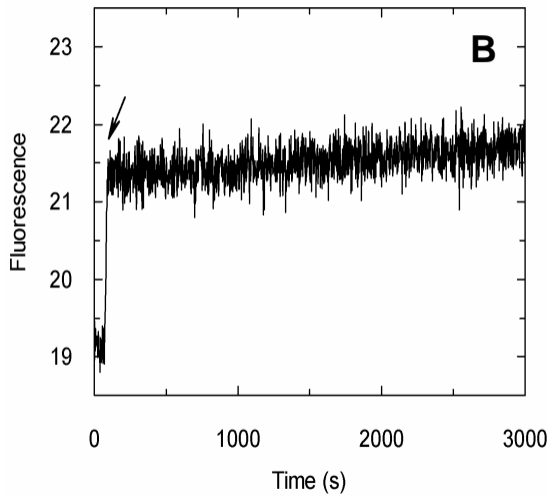

Supplement: pnas_0701817104_13.pdf [file pnas_0701817104_13.pdf]

Fluorescence (Ex:490nm, Em: 538nm)

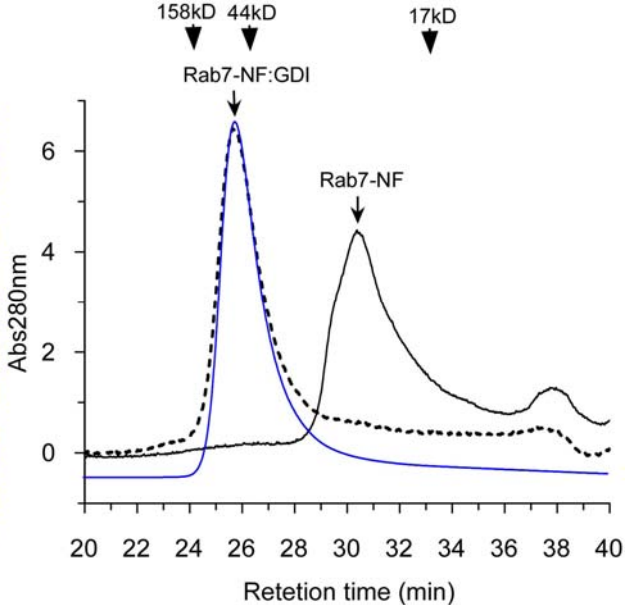

Supplement: pnas_0701817104_2.pdf [file pnas_0701817104_2.pdf]

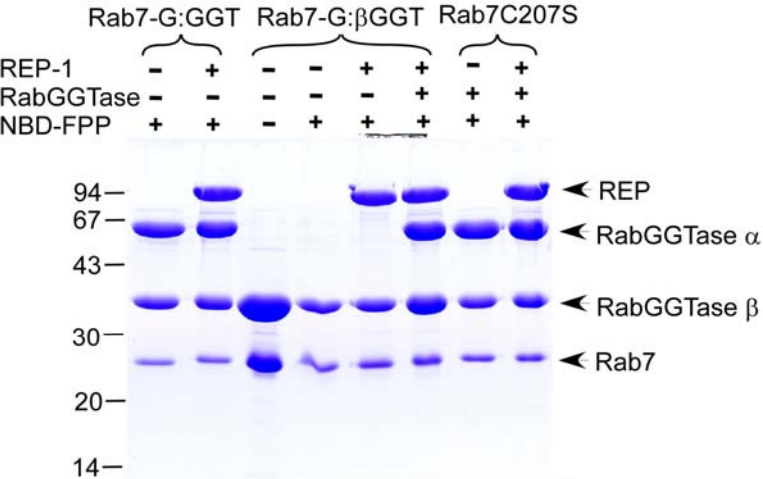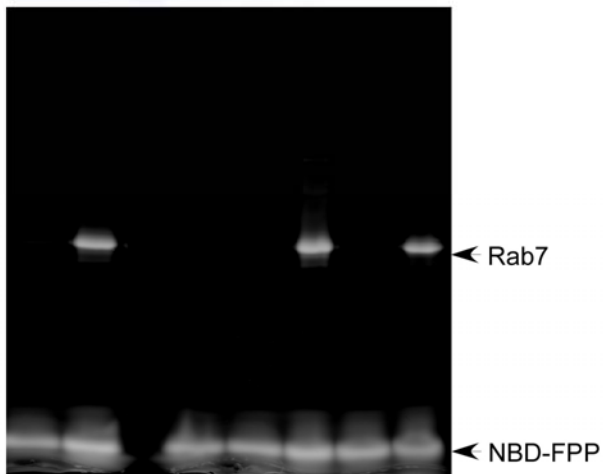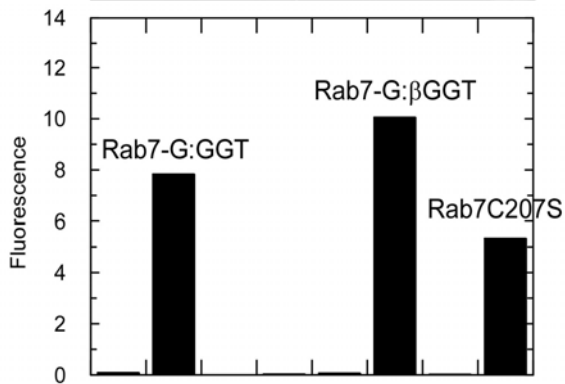

Supplement: pnas_0701817104_3.pdf [file pnas_0701817104_3.pdf]

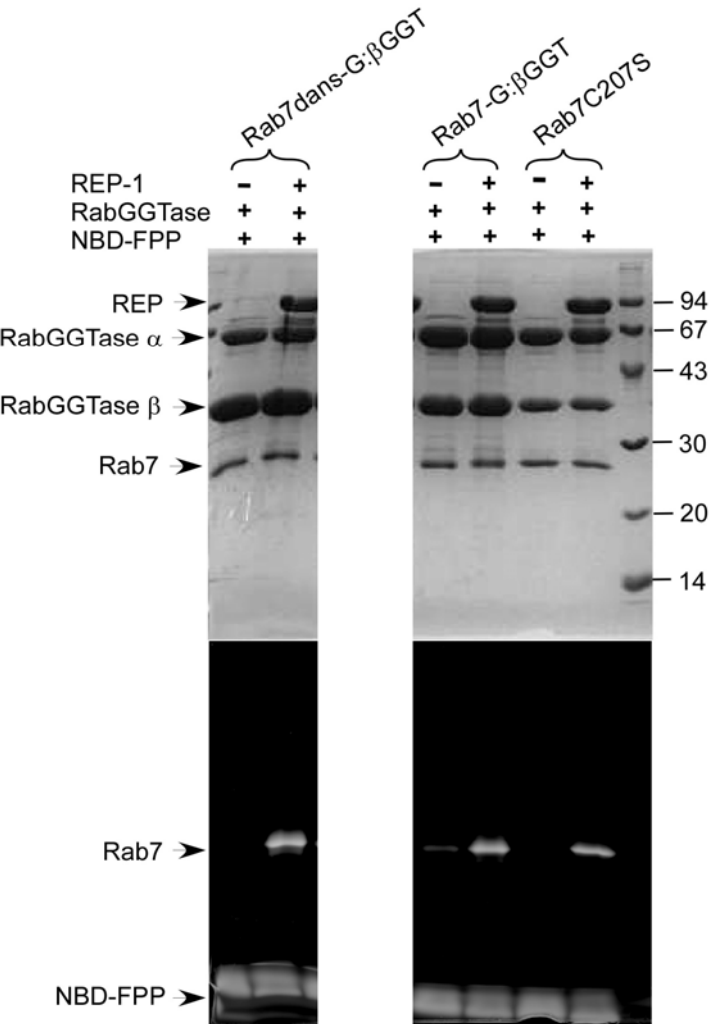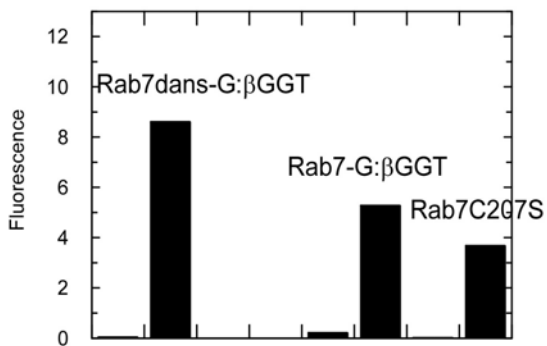

Supplement: pnas_0701817104_4.pdf [file pnas_0701817104_4.pdf]

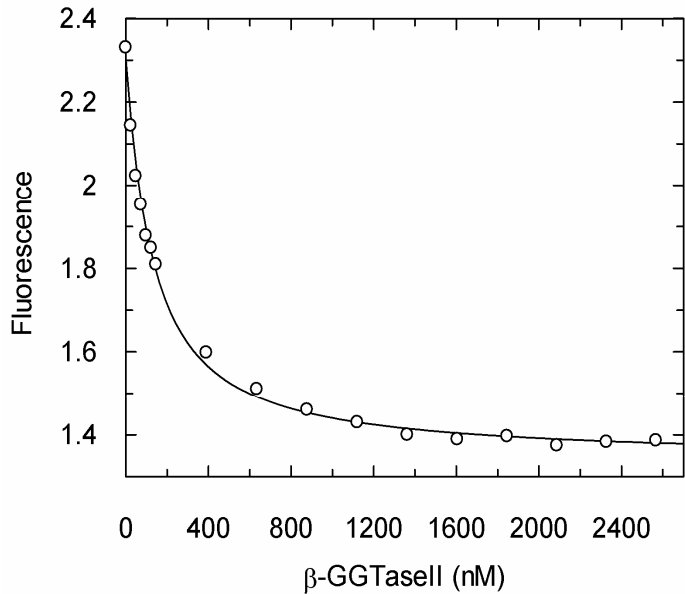

Supplement: pnas_0701817104_5.pdf [file pnas_0701817104_5.pdf]

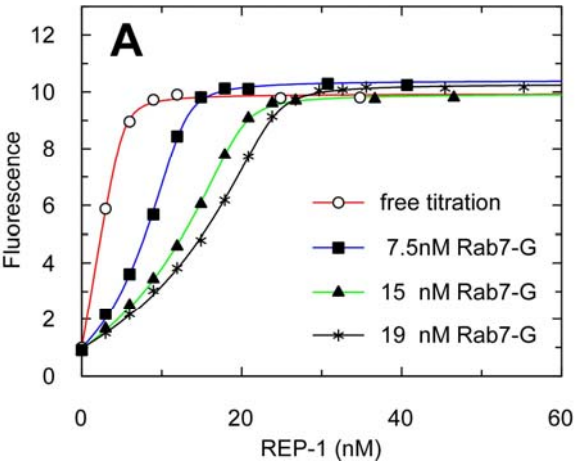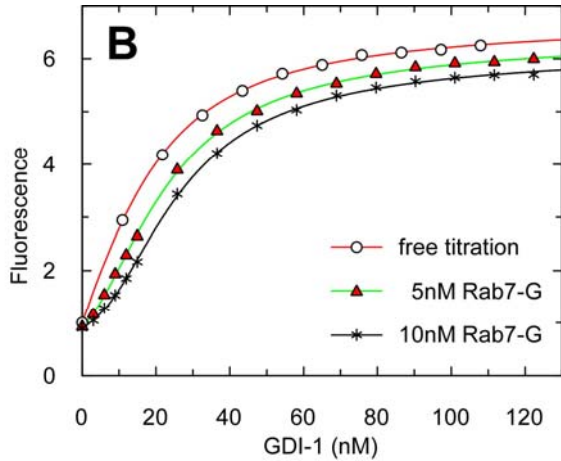

Supplement: pnas_0701817104_6.pdf [file pnas_0701817104_6.pdf]

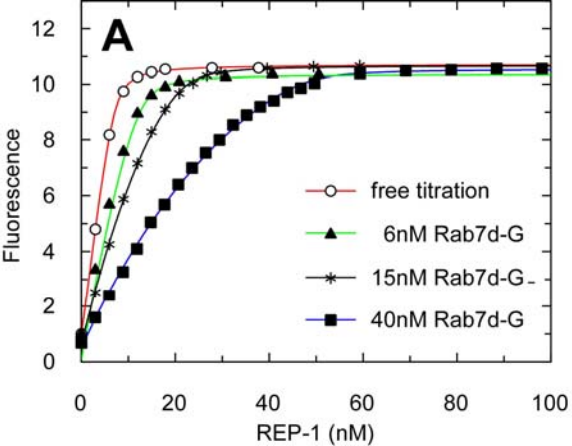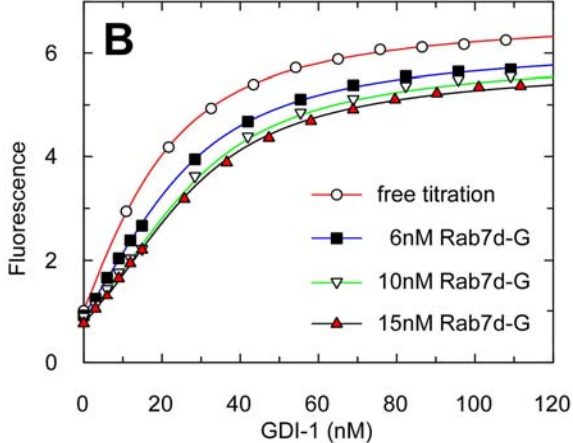

Supplement: pnas_0701817104_7.pdf [file pnas_0701817104_7.pdf]

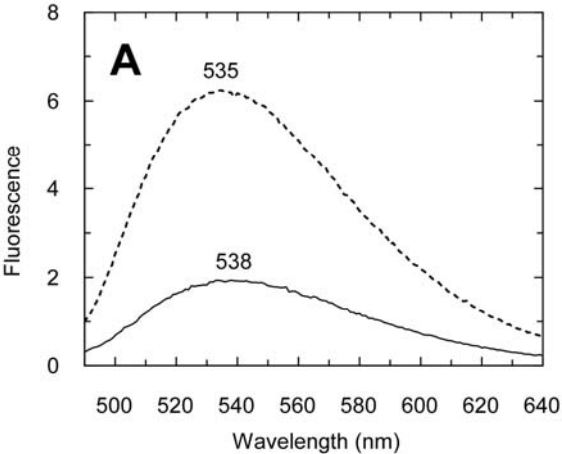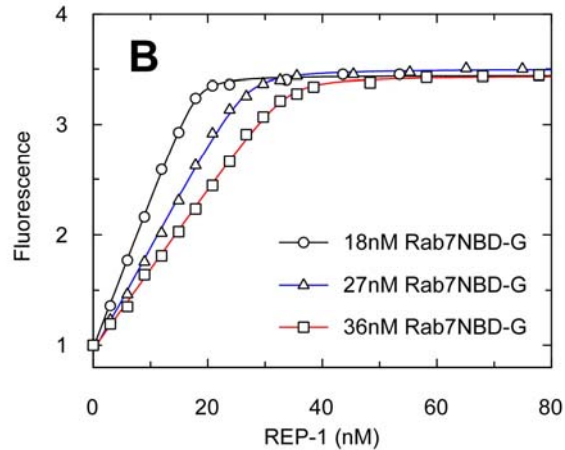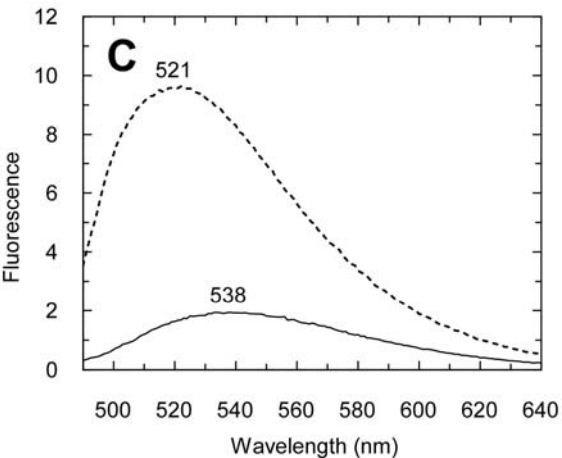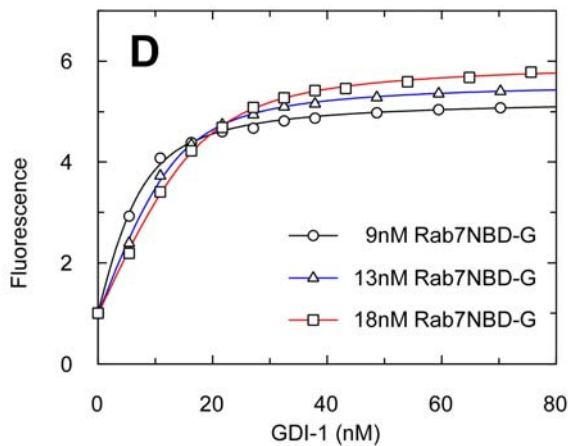

Supplement: pnas_0701817104_8.pdf [file pnas_0701817104_8.pdf]

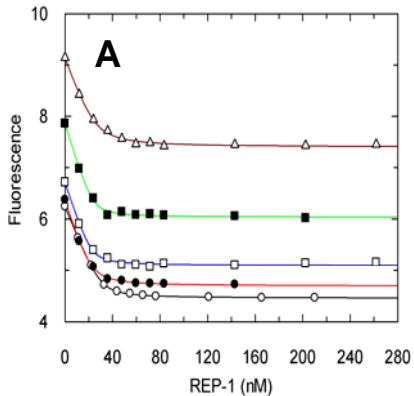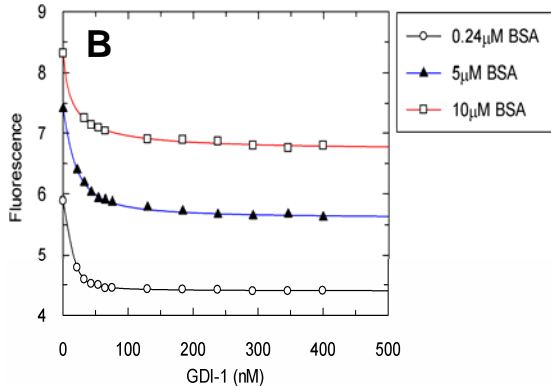

Supplement: pnas_0701817104_9.pdf [file pnas_0701817104_9.pdf]
